# Supplementary material for: Thermophilic Filamentous Fungus C1-Cell-Cloned SARS-CoV-2-Spike-RBD-Subunit-Vaccine Adjuvanted with Aldydrogel®85 Protects K18-hACE2 Mice against Lethal Virus Challenge
Source: MDPI journal article supplement (doi:10.3390/vaccines10122119), 2022-12-11
Supplement: s1 [file s1]

# Thermophilic Filamentous Fungus C1-Cell-Cloned SARS-CoV-2-Spike-RBD-Subunit-Vaccine Adjuvanted with Aldydrogel<sup>®</sup>85 Protects K18-hACE2 Mice Against Lethal Virus Challenge.

## Supplementary Materials

**Table S1.** DNA Oligonucleotide primers used in cloning of RBD-C-tag and C1 strain construction.

**Assay S1.** Quantitative assays for human Angiotensin Converting Enzyme 2 receptor binding reactions between purified recombinant C1-RBD-C-tag and ACE2.

**Assay S2.** Anti-SARS-CoV-2-RBD-specific IgG monitoring by direct ELISA

**Fig S1.** The dose responsiveness of C1-RBD-C-tag to recombinant ACE2.

## Supplementary tables.

**Table S1.** DNA Oligonucleotide primers used in cloning of RBD-C-tag and C1 strain construction.

| Primer                      | Usage                                                     | Sequence                                                                 |
|-----------------------------|-----------------------------------------------------------|--------------------------------------------------------------------------|
| oMYT1371_Blg8_pr_for        | Amplification of fragment from GenScript plasmid, forward | CCTTTCCCTTACTCACACAGACA                                                  |
| oMYT2533_RBD_chi_term_R     | Amplification of fragment from GenScript plasmid, reverse | GCTCCCCTCTCTCGACCAG<br>GACTCGGGAGGTCATAGGG<br>CCTTAGGCCTCCGGCTCGC<br>TGC |
| oMYT0746_bgl8_5int_1        | Check for correct integration in genome                   | CTCGCACCGTAAGGACCAAG                                                     |
| oMYT2823_RBD_start_rev      | Check for correct integration in genome                   | CGTTGAAGACCTCGCCGAA                                                      |
| oMYT1277_trpCtermF          | Check for correct integration in genome                   | GTGAATGCTCCGTAACACC<br>C                                                 |
| oMYT0748_bgl8_3int_1        | Check for correct integration in genome                   | AGCGTGACCCACTCAGGTAA                                                     |
| oMYT0529_bgl_qPCR           | Check for clone purity                                    | CACTACGTCAAGTTCGTCGA                                                     |
| oMYT0532_bgl_qPCR           | Check for clone purity                                    | GCCGTAGAAGTCGTTGGAG                                                      |
| oMYT0086_bgl_pr_s3          | Sequencing the construct                                  | CATCATCCGTCTTCCATCC                                                      |
| oMYT0107_chi1_term_rev      | Sequencing the construct                                  | GGTAAACATGTCCAGGCTTC                                                     |
| oMYT0461_03424-1_actin_qPCR | Check for DNA clone purity, reference gene                | CGACATGGAGAAGATCTGG<br>C                                                 |
| oMYT0462_03424-1_actin_qPCR | Check for DNA clone purity, reference gene                | AGCGTTGAACGTCTCGAAG                                                      |

## **Supplementary Assays.**

### **Assay S1. Quantitative assays for human Angiotensin Converting Enzyme 2 receptor binding reactions between purified recombinant C1-RBD-C-tag and ACE2.**

These binding assays were performed in an ELISA (Enzyme Linked ImmunoSorbent Assay) format. Briefly, 5 µg/ml of purified recombinant ACE2 was used to coat 96-well microtiter plates (Maxisorp, Thermo Fisher Scientific, UK) in 0.1 M carbonate buffer (pH 9.6) at 4°C overnight. Next, the plates were washed three times with wash buffer (0.9% NaCl, 0.05% Tween-20). After blocking non-specific protein binding with blocking buffer, additional buffer was added containing 2% BSA; 0.14M, NaCl; 0.05M, Trizma-base, pH 7.4; 0.05%, Tween-20; 0.05%, NaN<sub>3</sub>. Next the ACE2 containing ELISA plates were washed, and then serially diluted RBD-C-tag protein, 20 µg/ml, (and a control reference preparation of RBD manufactured in CHO cells), were added and incubated at 37°C for 1 hour, followed by three washes. RBD-C-tag binding to plate bound ACE2 was detected with purified Rabbit anti-RBD-IgG (IIBR) generated against RBD produced in mammalian cells and alkaline phosphatase-conjugated Goat Anti-Rabbit-IgG (GARIG, Jackson Immuno Research laboratories, Inc., PA, USA, 111-055-003) incubated at 37°C for 1 hr., followed by washing. The ACE2-RBD protein binding reactions were visualized by addition of SIGMAFAST™ p-NitroPhenyl Phosphate substrate (NPP, Sigma-Aldrich, MA USA) at 37°C for 30 minutes and protein absorbances at 405 nm were measured with a SpectraMax iD3 ELISA plate reader (Molecular Devices, CA, USA) fitted with SoftMax v7.0 software.

### **Assay S2 Anti-SARS-CoV-2-RBD-specific IgG monitoring by direct ELISA.**

Blood samples were collected from tail bleedings of vaccinated and naïve mice (BALB/c or K18-hACE2 transgenic mice on the C57BL/6J background) before and after prime and boost vaccination. These blood samples were coagulated at room temperature for 1 hour using Microtainer blood collection SST™ Tubes (BD, NJ, USA) and then centrifuged at 3,000 rpm for 10 min at 4 °C. The upper serum layer was collected and stored at -20°C. Recombinant RBD-C-tag was used to coat 96-well microtiter plates (NUNC-MaxiSorp, Thermo Fisher Scientific, USA) at a final concentration of 2.5 µg/ml in 50 mM carbonate coating buffer, pH 9.6 (Sigma-Aldrich, MA, USA) at 4°C overnight.

The next day, plates were washed three times with (0.9% NaCl, 0.05% Tween-20) and blocked with (2% BSA, 0.14M NaCl, 0.05M Trizma-base pH 7.4, 0.05% Tween-20, 0.05% NaN<sub>3</sub>) for 1 hr. at 37°C. Serially diluted mice sera were added and incubated at 37°C for 1 hr., and then the plates were washed three times. Donkey anti-Mouse IgG conjugated to Horseradish Peroxidase (DAMIG-HP, Jackson Immuno Research laboratories, Inc. PA, USA. 715-035-151) was diluted 1:1000 in blocking solution and added to the wells (100 µl/well). After incubation for 1 hr. at 37°C, the plates were washed three times and developed with 3,3',5,5'-TetraMethylBiphenyldiamine (TMB, Sigma-Aldrich, St. Louis, MA, USA)

for 10 min. The reactions were stopped with 50 µl/well of 1.0 M H<sub>2</sub>SO<sub>4</sub> reaction-stop solution. The absorbance was then measured with a microplate reader at 450 nm. To measure the titer of RBD-specific antibodies induced by recombinant protein antigen, peripheral blood serum samples were serially diluted and measured by titration and the Geometric Mean Titer (GMT or Geomean) of RBD-specific IgG in sera was calculated.

Supplementary figures.

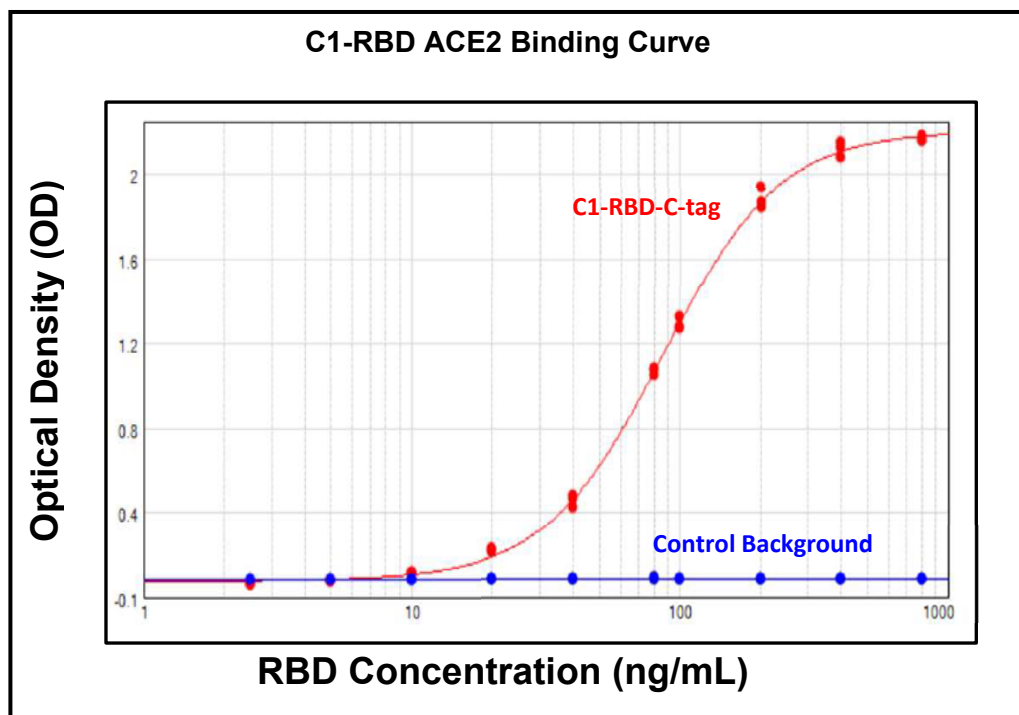

**Figure S1. The dose responsiveness of C1-RBD-C-tag to recombinant ACE2.**

Detection of C1-RBD-C-tag recombinant ACE2 binding interaction where ACE2 protein was coated on 96-well microtiter plates and C1-RBD concentration was varied, 1000-2.5 ng/ml.
